# Supplementary material for: Highly reversible aqueous zinc-ion battery using the chelating agent triethanolamine as an electrolyte additive
Source: Royal Society of Chemistry journal article supplement (doi:10.1039/d2ce01089e), 2022-01-01
Supplement: d2ce01089e1.pdf [file d2ce01089e1.pdf]

## Supplementary Information

### Highly Reversible Aqueous Zinc-ion Battery by Chelating Agent Triethanolamine as Electrolyte Additive

Yunhui Lin <sup>a, \*</sup>, Youzuo Hu <sup>a</sup>, Shu Zhang <sup>a</sup>, Ziqiang Xu <sup>a</sup>, Tingting Feng <sup>a</sup>, Haiping Zhou <sup>a</sup>, Mengqiang Wu <sup>a, b, \*</sup>

<sup>a</sup> School of Materials and Energy, University of Electronic Science and Technology of China, Chengdu 611731, China

<sup>b</sup> Yangtze Delta Region Institute (Huzhou), University of Electronic Science and Technology of China, Huzhou 313001, China

\* Corresponding author. E-mail: E-mail: [yunhuilin@uestc.edu.cn](mailto:yunhuilin@uestc.edu.cn), [mwu@uestc.edu.cn](mailto:mwu@uestc.edu.cn)

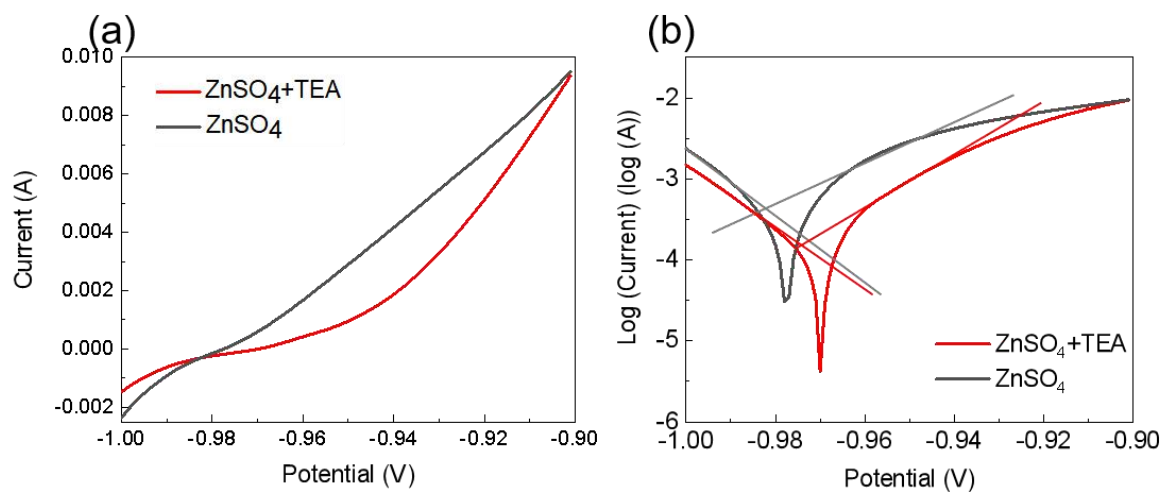

Figure S1. Linear sweep voltammetry (LSV) (a) and Linear polarization curves (b) of Zn foil in the electrolyte: electrolyte ZnSO<sub>4</sub>+TEA and ZnSO<sub>4</sub>.

Table S1

| Electrolyte                              | ZnSO <sub>4</sub> | ZnSO <sub>4</sub> +TEA |
|------------------------------------------|-------------------|------------------------|
| E <sub>corr</sub> (V)                    | -0.985            | -0.975                 |
| I <sub>corr</sub> (μA cm <sup>-2</sup> ) | 530               | 150                    |

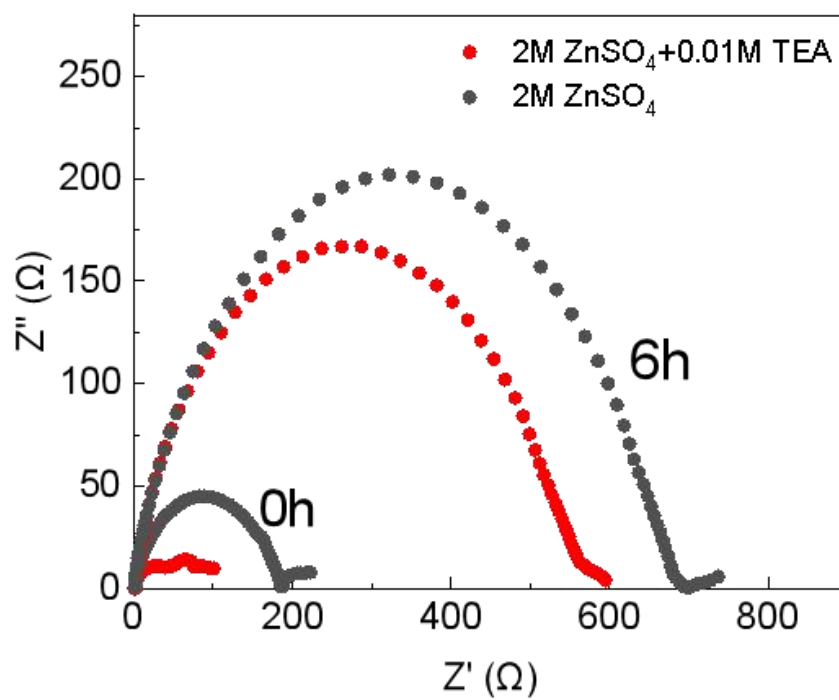

Figure S2. Electrochemical impedance spectroscopy (EIS) of symmetric cells Zn||Zn fresh and after standing 6 hours with electrolyte ZnSO<sub>4</sub>+TEA and ZnSO<sub>4</sub>.

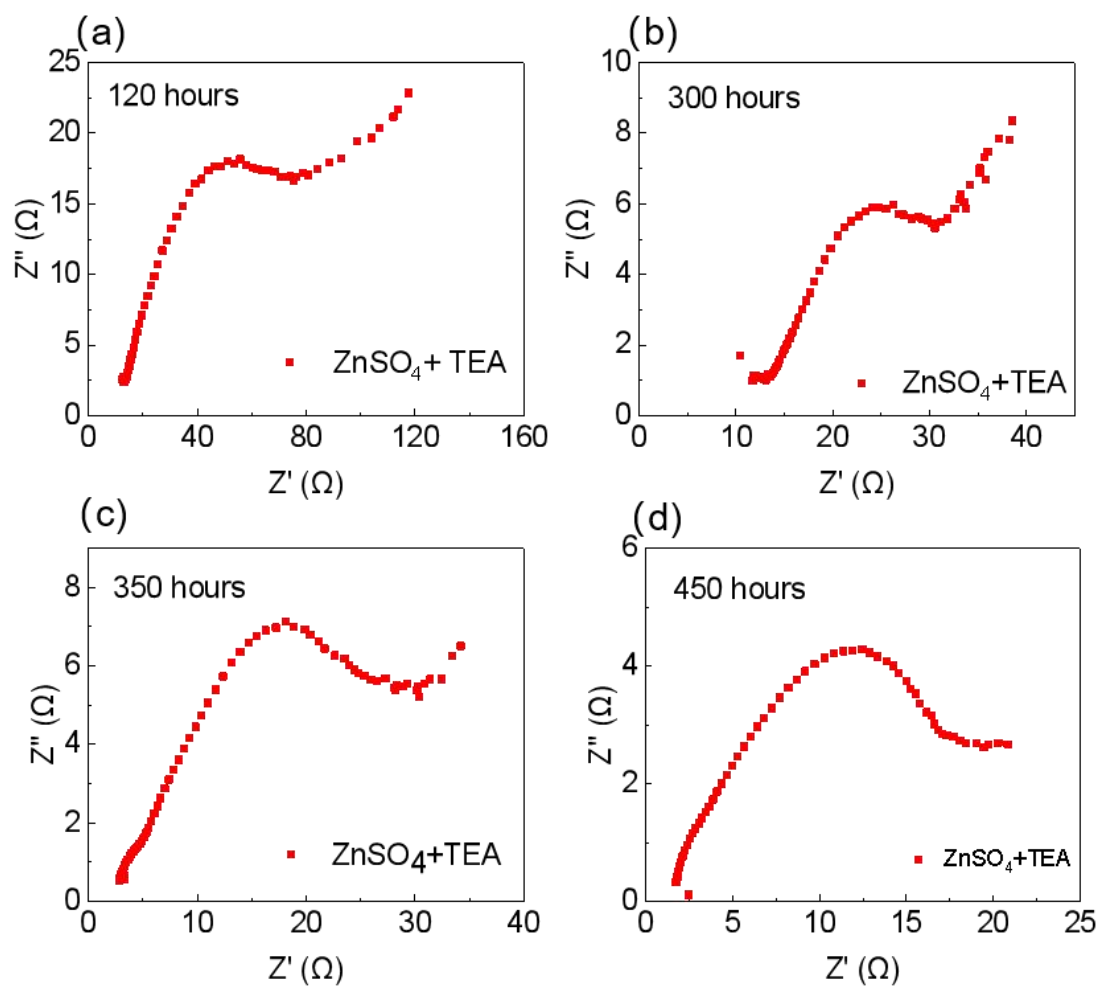

Figure S3. EIS of symmetric cell Zn||Zn at different cycle with electrolyte of ZnSO<sub>4</sub>+TEA

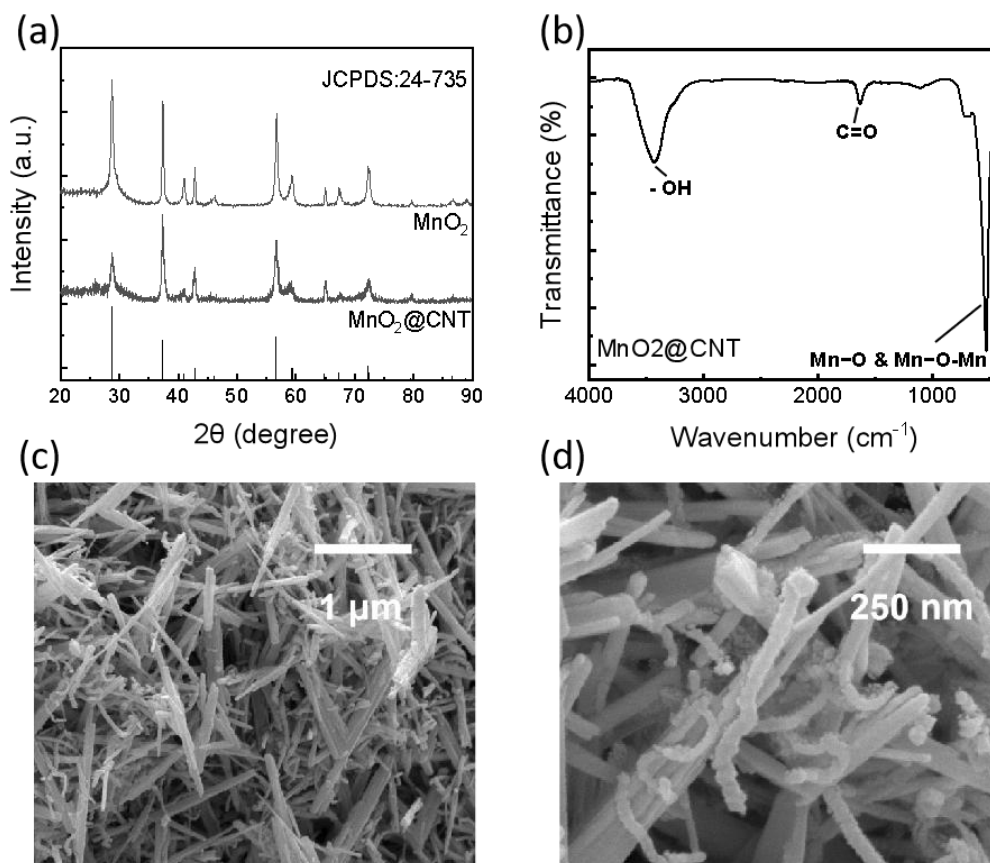

Figure S4. XRD of MnO<sub>2</sub>@CNT (a), FTIR of MnO<sub>2</sub>@CNT (b), and SEM images of MnO<sub>2</sub>@CNT with different magnification (c and d).

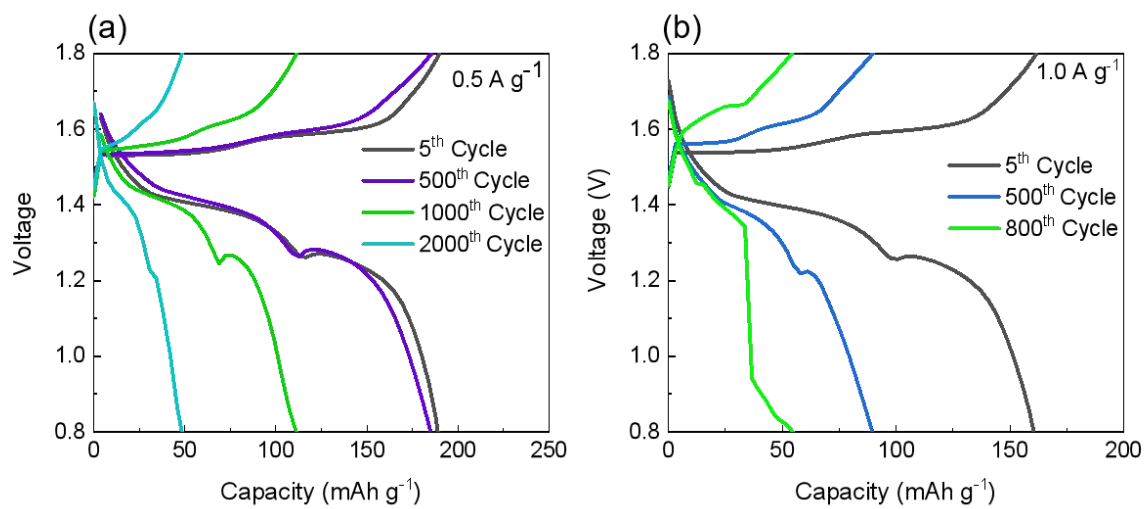

Figure S5. Charge/discharge curves of Zn||MnO<sub>2</sub>@CNT in electrolyte without TEA additive for different cycles at 0.5 A g<sup>-1</sup> (a) and 1.0 A g<sup>-1</sup> (b).

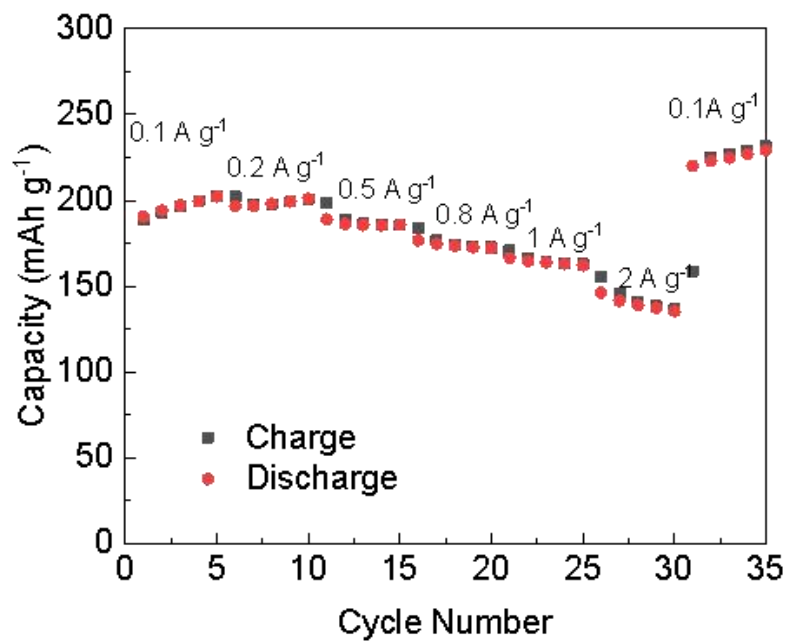

Figure S 6 Rate performance of Zn||MnO<sub>2</sub>@CNT in electrolyte without TEA additive from current density 0.1-2 A g<sup>-1</sup>

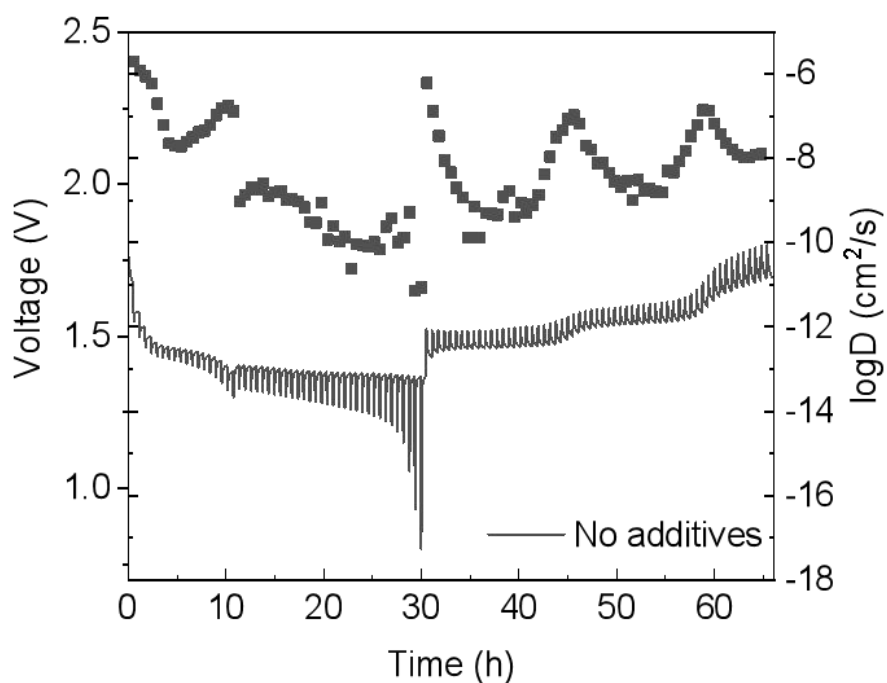

Figure S 7. GITT of Zn||MnO<sub>2</sub>@CNT in electrolyte without TEA additive

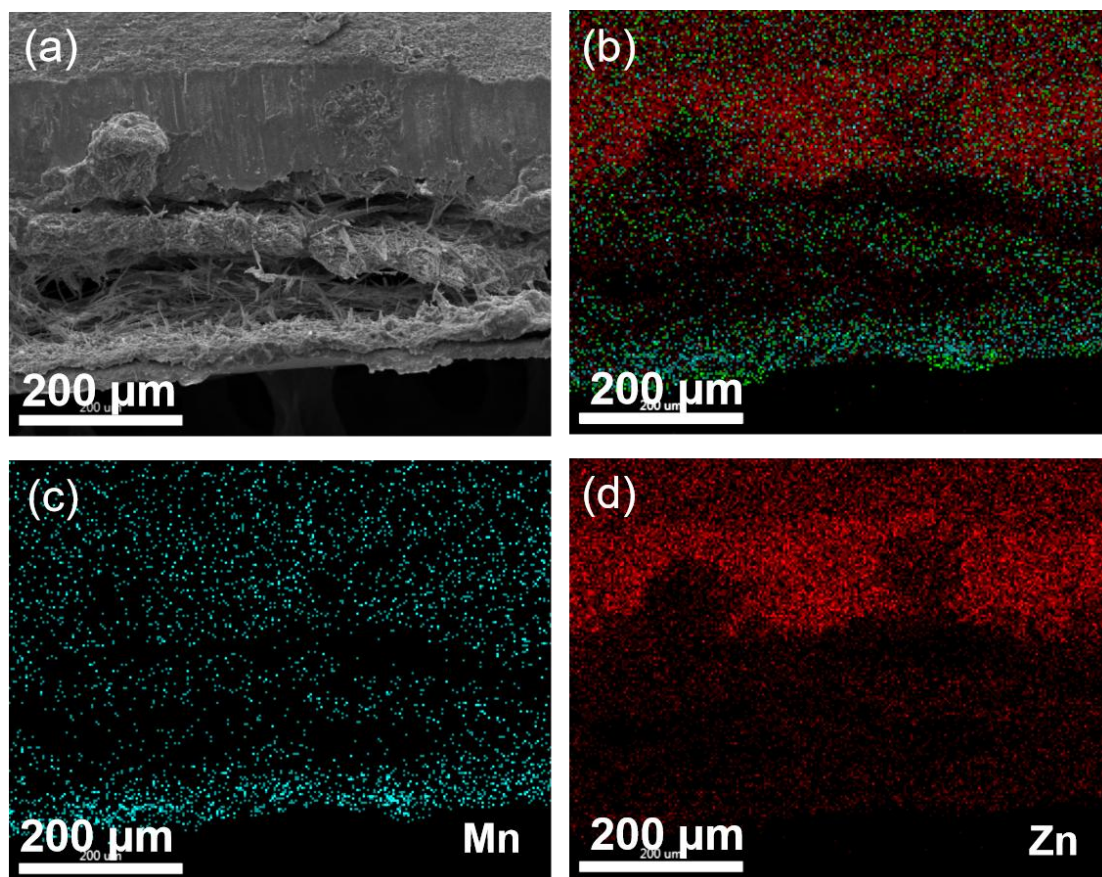

Figure S8. SEM image of cross-section of cell Zn||MnO<sub>2</sub>@CNT with TEA additive in electrolyte (a), EDS mapping (b) of elements Mn (c) and Zn (d).



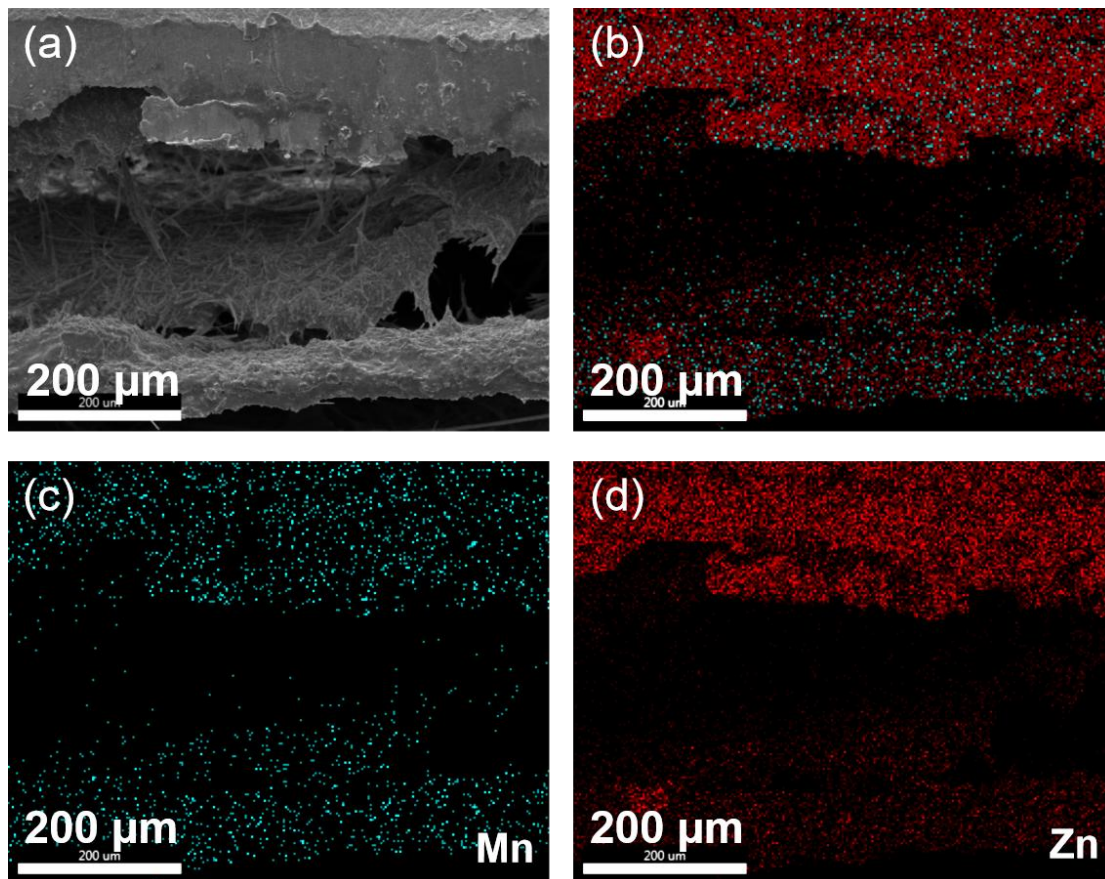

Figure S9. SEM image of cross-section of cell Zn||MnO<sub>2</sub>@CNT without TEA additive in electrolyte (a), EDS mapping (b) of elements Mn (c) and Zn (d).

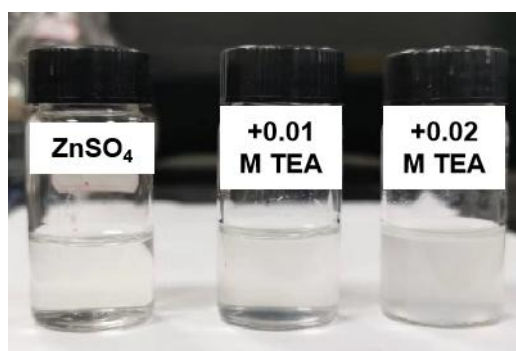

Figure S10 Photograph of solutions: 2M ZnSO<sub>4</sub>, 2M ZnSO<sub>4</sub>+0.01 M TEA, and 2M ZnSO<sub>4</sub>+0.02 M TEA.

Table 2. Recent studies of electrolyte additive in aqueous zinc-ion battery.

| Additive | Cthode                                | Electrolyte                                                    | Cycling stability                                                                                  | Ref.      |
|----------|---------------------------------------|----------------------------------------------------------------|----------------------------------------------------------------------------------------------------|-----------|
| SDS      | Na <sub>2</sub> MnFe(CN) <sub>6</sub> | 1 M ZnSO <sub>4</sub> +<br>1 M Na <sub>2</sub> SO <sub>4</sub> | 75% after 2000 cycles<br>at 0.8 A g <sup>-1</sup>                                                  | [1]       |
| glucose  | MnO <sub>2</sub>                      | 1 M ZnSO <sub>4</sub>                                          | 80 % after<br>1000 cycles at 3 A g <sup>-1</sup>                                                   | [2]       |
| BIS-TRIS | MnO <sub>2</sub>                      | 2 M ZnSO <sub>4</sub>                                          | 86% after 600 cycles<br>at 0.5 A g <sup>-1</sup>                                                   | [3]       |
| TEHS     | MnO <sub>2</sub>                      | 0.5 M ZnSO <sub>4</sub>                                        | 83% after 200 cycles<br>at 0.2 A g <sup>-1</sup>                                                   | [4]       |
| EDTA     | MnO <sub>2</sub> /graphite            | 2 M ZnSO <sub>4</sub>                                          | 81% after 1000 cycles<br>at 1 A g <sup>-1</sup>                                                    | [5]       |
| EDTA     | MnO <sub>2</sub>                      | 2M ZnSO <sub>4</sub>                                           | 71% after 500 cycles<br>at 1 mA cm <sup>-2</sup>                                                   | [6]       |
| PAM      | MnO <sub>2</sub>                      | 2M ZnSO <sub>4</sub> +<br>0.1M MnSO <sub>4</sub>               | 87% after 200 cycles<br>at 0.2 A g <sup>-1</sup><br>98% after 600 cycles<br>at 1 A g <sup>-1</sup> | [7]       |
| TEA      | MnO <sub>2</sub> /CNT                 | 2M ZnSO <sub>4</sub> +<br>0.1M MnSO <sub>4</sub>               | 78% after 2000 cycles<br>at 0.5 A g <sup>-1</sup>                                                  | This work |

## Reference

1. Hou, Z., et al., *Surfactant widens the electrochemical window of an aqueous electrolyte for better rechargeable aqueous sodium/zinc battery*. Journal of Materials Chemistry A, 2017. **5**(2): p. 730-738.
2. Sun, P., et al., *Simultaneous Regulation on Solvation Shell and Electrode Interface for Dendrite-Free Zn Ion Batteries: Achieved by a Low-Cost Glucose Additive*. 2021.
3. Luo, M., et al., *Dendrite-free zinc anode enabled by zinc-chelating chemistry*. Energy Storage Materials, 2021. **41**: p. 515-521.
4. Qian, L., et al., *Cations Coordination-Regulated Reversibility Enhancement for Aqueous Zn-Ion Battery*. Advanced Functional Materials, 2021. **31**(40): p. 2105736.
5. Cao, J., et al., *Stabilizing zinc anode via a chelation and desolvation electrolyte additive*. Advanced Powder Materials, 2022. **1**(1): p. 100007.
6. Ou, Y., et al., *Reversible aqueous Zn battery anode enabled by a stable complexation adsorbent interface*. **n/a**(n/a): p. e12167.
7. Zhang, Q., et al., *The Three-Dimensional Dendrite-Free Zinc Anode on a Copper Mesh with a Zinc-Oriented Polyacrylamide Electrolyte Additive*. 2019. **58**(44): p. 15841-15847.
